# Supplementary material
Source: Elsevier journal article supplement (https://www.sciencedirect.com/science/article/pii/S223878541930290X)
Supplement: mmc1 [file S223878541930290X:mmc1.docx]

|  | 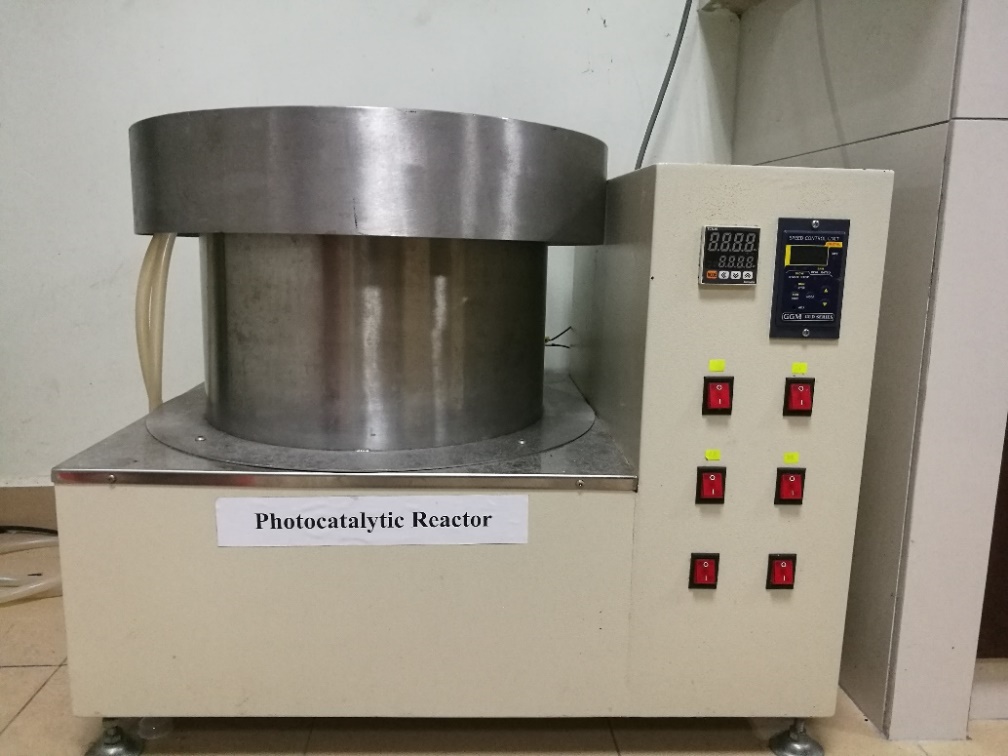  Light source control  Temperature controller  Circulating water jackets  Cooling fan control  Photocatalytic reactor  Stirring control unit |  |
| --- | --- | --- |
|  | (a) |  |
|  | 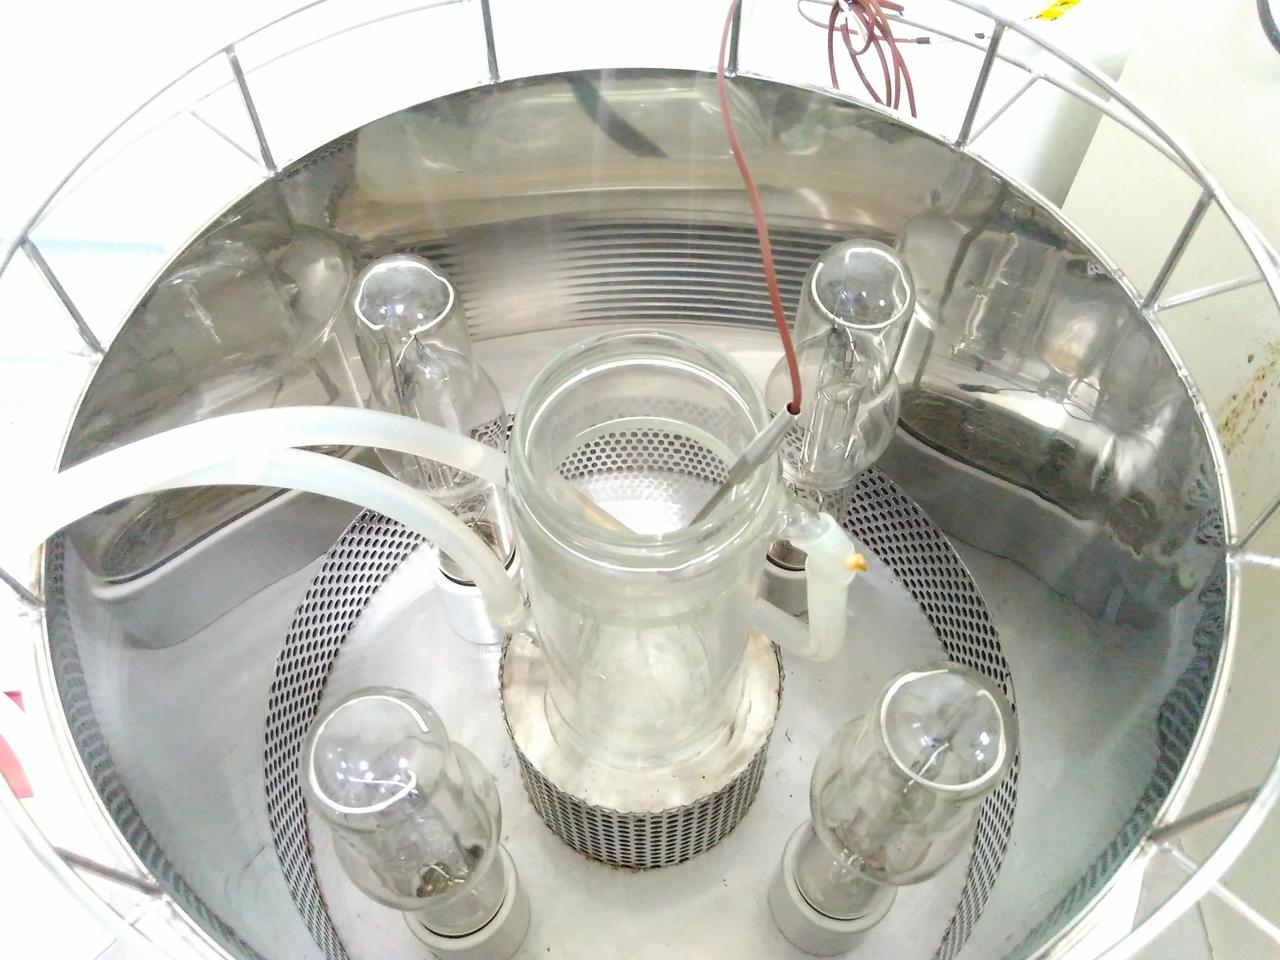  Magnetic stirrer  Quartz reactor  Thermocouple  Light source  Circulating water jackets |  |
|  | (b) |  |

Supplemental Fig. 1. (a) Exterior view and (b) interior view of self-assembled photocatalytic setup.
